# Supplementary material
Source: PubMed Central journal article supplement (PMC2474511)
Supplement: 0804123105_0804123105SI.pdf [file 0804123105_0804123105SI.pdf]

# Supporting Information

Yuan et al. 10.1073/pnas.0804123105

## SI Text

**Preparation of PEG800 and NIR Fluorescence Imaging.** NIR fluorophore-conjugated PEG800 was synthesized by conjugation of 20 nmol of *N*-hydroxysuccinimide ester of IRDye 800-CW (LI-COR, Lincoln, NE) to 10 nmol of 5-kDa amino monomethoxy PEG (Nektar, Huntsville, AL) in phosphate buffer, pH 7.8. After purification of the product (PEG800) using gel-filtration chromatography on a 6 kDa MWCO Econo-Pac P6 cartridge (Bio-Rad, Hercules, CA), it was lyophilized and resuspended at a final concentration of 10  $\mu$ M in PBS, pH 7.4 before injection. *In vivo* NIR fluorescence imaging was performed as described in detail previously (1) after i.v. injection of 0.5 nmol of PEG800.

**Primary Endothelial Cell Isolation.** Endothelial cells were isolated from p85 $\alpha$ flox/flox; p85 $\beta^{-/-}$  adult mouse lungs. Four lungs were dissected and washed with cold HBSS with antibiotics. The tissue was minced into 2-mm pieces and transferred into tubes containing 15 ml of warm 0.1% collagenase type I (Worthington) in DMEM with antibiotics. Tissues were digested for 30 min at 37°C with agitation. Tissues were pipetted up and down to break up

clumps and filtered through a 70  $\mu$ m filter. Cells were pelleted at 100  $\times$  g for 5 min and resuspended in PBS/0.1% BSA/1 mM CaCl<sub>2</sub>/0.5 mM MgCl<sub>2</sub>/120 Kunitz DNase1/ml. The cells were rocked for 15 min at room temperature to eliminate DNA from lysed cells. After pelleting, the cells were washed twice in wash buffer (PBS without Ca<sup>2+</sup>/Mg<sup>2+</sup>/0.1% BSA/2 mM EDTA) and resuspended in 1.5 ml of wash buffer with 2.5  $\mu$ g of rat anti-mouse CD31 antibody (BD Biosciences). Cells were rocked gently for 20 min at 4°C and then washed with 2 ml of wash buffer. Cells were resuspended in 2 ml wash buffer and 25  $\mu$ l Dynabeads M450 sheep anti-rat IgG (Invitrogen) was added. Cells and beads were rocked for 20 min at 4°C followed by magnetic separation of cell-bead complexes. Beads were washed four times in wash buffer and plated on 0.1% gelatin-coated plates. Cells were fed every 2 days with EBM-2 (Lonza)/ 0.05% Endothelial Cell Mitogen (Biomedical Technologies, Inc.)/ 20% inactivated FBS/ penicillin/streptomycin. After 2 weeks of growth, cells were immortalized by retroviral infection of a p53 short hairpin construct followed by a second round of magnetic bead separation as described above.

1. Nakayama A, del Monte F, Hajjar RJ, Frangioni JV (2002) Functional near-infrared fluorescence imaging for cardiac surgery and targeted gene therapy. *Mol Imaging* 1(4):365–377.

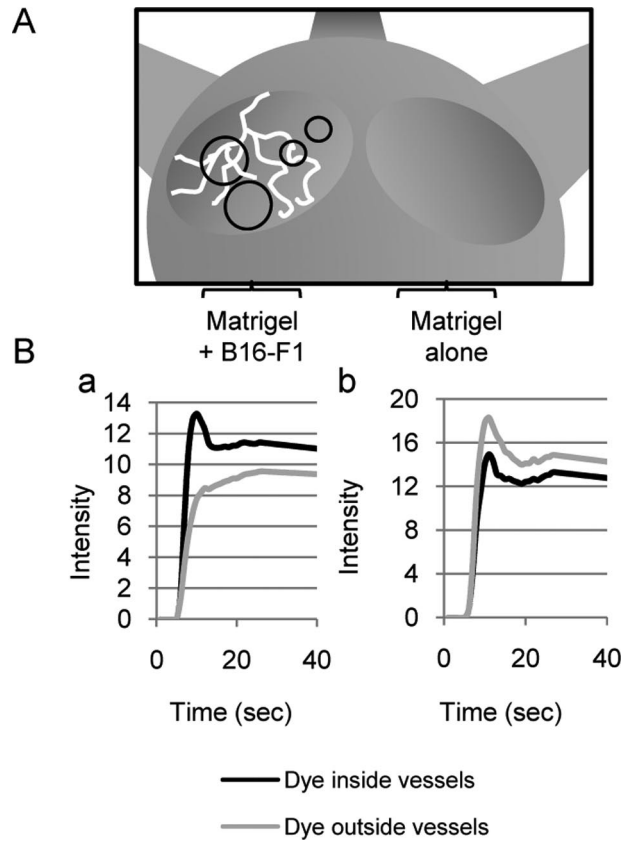

**Fig. S1.** Method of dye extravasation quantification. (A) NIR intensity was measured within demarcated regions of interest (ROI) representing intravascular and extravascular regions, as illustrated. (B) NIR intensity was quantified in ROIs over time. (a) More NIR dye is enclosed within vessels at all time points. (b) Rapid extravasation of dye to extravascular regions. Results were consistent when analyzing small or large ROIs. These intensity values were used to determine permeability ratios in Fig. 3 B and C.

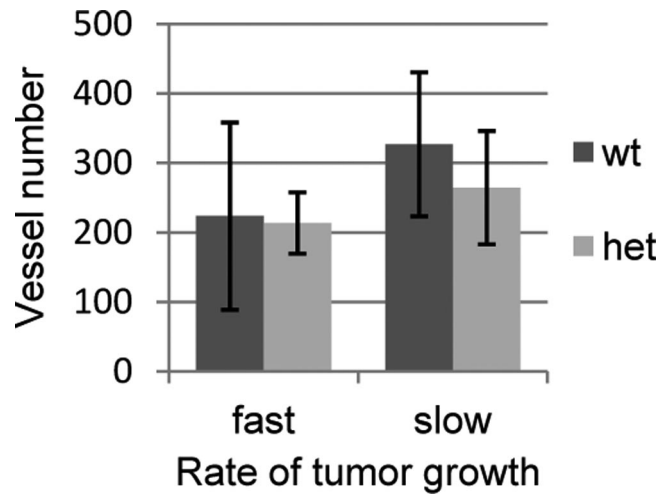

**Fig. S2.** Vessel density within tumors was measured by counting CD31-positive structures in tumor sections. There was no difference in vessel density between wild-type and heterozygous mice, regardless of the rate of tumor growth.
